## Use of esophageal stents to relieve dysphagia during neoadjuvant therapy prior to esophageal resection: a systematic review

O. Ahmed,<sup>1</sup> J.C. Bolger,<sup>1,2</sup> B. O'Neill,<sup>3</sup> W.B. Robb,<sup>1,2</sup>

<sup>1</sup>Department of Upper Gastrointestinal Surgery, Beaumont Hospital, Dublin 9, Ireland, <sup>2</sup>Department of Surgery, Royal College of Surgeons in Ireland, Dublin 2, Ireland, and <sup>3</sup>Department of Radiation Oncology, Beaumont Hospital, Dublin 9, Ireland

**SUMMARY.** Esophageal cancer stenting offers symptomatic relief for patients suffering from dysphagia. There are limited data to support their use to relieve dysphagia and improve nutrition during neoadjuvant therapy with some concern that they may negatively impact oncological outcomes. The aim of this systematic review was to quantify the impact of esophageal stents on outcomes prior to resection with curative intent. A literature search was performed using Embase, Medline, PubMed, PubMed Central, the Cochrane library for articles pertaining to esophageal stent use prior to or during neoadjuvant chemotherapy or chemoradiotherapy in patients planned for curative esophagectomy. Data extracted included basic demographics, clinical, nutritional and oncologic outcomes. A total of 9 studies involving 465 patients were included. Esophageal stent use resulted in a significant improvement in mean dysphagia scores in the immediate post stent period but failed to demonstrate any positive changes in weight, body mass index (BMI) or albumin. Only 33% of stented patients ultimately progressed to potential curative surgical resection and stents were associated with reduced R0 resection rates and lower overall survival. This systematic review shows that, although esophageal stenting is associated with improvements in dysphagia during neoadjuvant therapy, their effect on improving patient nutritional status is less clear and they may be associated with poorer long-term oncological outcomes. Stents should be used with caution in patients who are being considered for potentially curative resection of esophageal malignancies and other strategies of nutritional supplementation should be considered.

**KEY WORDS:** esophageal malignancy, neoadjuvant therapy, bridge to surgery.

### INTRODUCTION

Multidisciplinary and modality approaches to the treatment of esophageal cancer has been shown to provide incremental improvements in 5-year survival rates, which now may be as high as 47%.<sup>1</sup> Dysphagia, with subsequent malnutrition, debilitates patients and may compromise long-term prognosis.<sup>2</sup> Malnutrition at the time of diagnosis is associated with a poorer response to chemotherapy, which impacts upon the likelihood of patients undergoing resection with curative intent.<sup>3</sup> Preoperative malnutrition has consistently been shown to increase postoperative morbidity and mortality rates in esophageal cancer patients and, when malnutrition is severe, it may be regarded as a contraindication to surgery.<sup>3, 4</sup>

Neoadjuvant therapy has been shown to provide a survival advantage.<sup>1, 5</sup> Neoadjuvant therapy comes with its own specific nutritional challenges, with potential for a period of prolonged dysphagia and

reduced calorie intake prior to surgical resection. Strategies to optimize nutrition in the neoadjuvant and perioperative periods are important to reduce treatment delays and perioperative morbidity associated with malnutrition.<sup>6, 7</sup> Although esophageal stenting is the preferred modality for palliation of dysphagia,<sup>8, 9</sup> its use as a means of improving patient nutrition during neoadjuvant treatment is debated. Relieving dysphagia with an esophageal stent in the hope of improving nutrition prior to, or during, neoadjuvant therapy and surgery may provide prompt symptom relief but also presents challenges. Stent-related adverse events are common and studies have previously reported on their potential negative impact on long-term oncologic outcomes.<sup>9–13</sup>

The purpose of this systematic review was to assess the safety, efficacy, oncological outcomes and survival associated with the use of self-expanding metallic stents (SEMS) and self-expanding plastic stents

**Table 1** Study inclusion and exclusion criteria**Inclusion criteria**

Studies involving patients with an esophageal cancer diagnosis undergoing metallic or plastic esophageal stent insertion preintervention as compared with standard care

Original publication (reviews, opinions, letters, protocols and conference proceedings excluded)

Reported outcome measures on at least one of:

- morbidity
- mortality
- readmission/reintervention rates
- oncologic outcomes

**Exclusion criteria**

Studies where biodegradable stents were included

Patients not suitable for operative resection

Postoperative patients

Recurrent esophageal cancer

Papers where data was unavailable or uninterpretable and authors uncontactable

Papers in languages other than English

Nonhuman studies

(SEPS) as a bridge to curative surgery in patients with esophageal cancer.

## METHODS

### Search strategy and study selection

The present review was conducted according to the Preferred Reporting Items for Systematic Reviews and Meta-Analyses.<sup>12</sup> We conducted a comprehensive review of original articles published in English containing data on clinical, oncological and nutritional outcomes in patients with esophageal cancer undergoing esophageal stenting as a bridge to surgery during neoadjuvant therapy. An electronic search of five major databases (Embase, Medline, PubMed, PubMed Central and Cochrane library) was performed for relevant original articles up to and inclusive of November 2018. The following Boolean search terms were employed: esophageal stent OR metallic OR plastic stent AND esophagectomy OR esophageal resection and the search strategy was inclusive of the alternative European spelling of ‘oesophagus’. In addition to the primary electronic search, the bibliographies of selected articles were manually reviewed to identify other studies for inclusion and an additional review of the ‘related citations’ in PubMed was also performed. Data extraction from selected studies was based on strictly defined criteria as shown in [Table 1](#). Exclusion criteria were case reports, review articles and studies reporting on the efficacy of biodegradable stenting where the outcomes of metallic and plastic stenting could not be separated. Studies focussing on palliative stenting in esophageal malignancy, postoperative patients or patients with recurrent disease were also excluded.

### Data collection and statistical analysis

Two independent reviewers applied the stated inclusion and exclusion criteria to retrieve citations and

selected full papers for analysis. When two publications were believed to involve potentially duplicated or overlapping patient populations (based on authors, institutions and study years), only the most recent and most comprehensive cohort was included to avoid double-counting subjects and discrepancies were agreed upon by consensus. All search results were combined in a reference manager database (Endnote X8) and duplicates were removed. For each study, data on author institution, country, study period and methodology, total number of patients, patient sex, cancer histology, oncologic staging, type of stent and operative morbidity and mortality were extracted. Basic descriptive statistics were used to summarize patient and study characteristics and weighted mean values were recorded. Given the paucity of data on this topic, any measure of survival (median, 1, 3 or 5-year survival) was extracted. Continuous variables were compared using unpaired *t*-tests. Association of categorical variables (differences for dichotomous variables between groups) was assessed using a chi-square ( $X^2$ ) test. A significance level of 0.05 was used for all analyses and all *p* values reported are two-tailed. Study methodological quality was assessed by applying the Methodological Index for Non-Randomized Studies (MINORS).<sup>13</sup>

## RESULTS

After the initial screening of titles and abstracts regarding metallic or plastic stenting as a bridge to surgery in esophageal malignancy, 788 duplicates were excluded and 2861 studies were reviewed. Of these, 2811 records were deemed irrelevant and excluded after title and abstract analysis for failing to meet the inclusion criteria. Upon review of the remaining 50 publications in full, a further 39 were excluded for including palliative cases only in their analysis, and 2 studies were rejected for uninterpretable data.

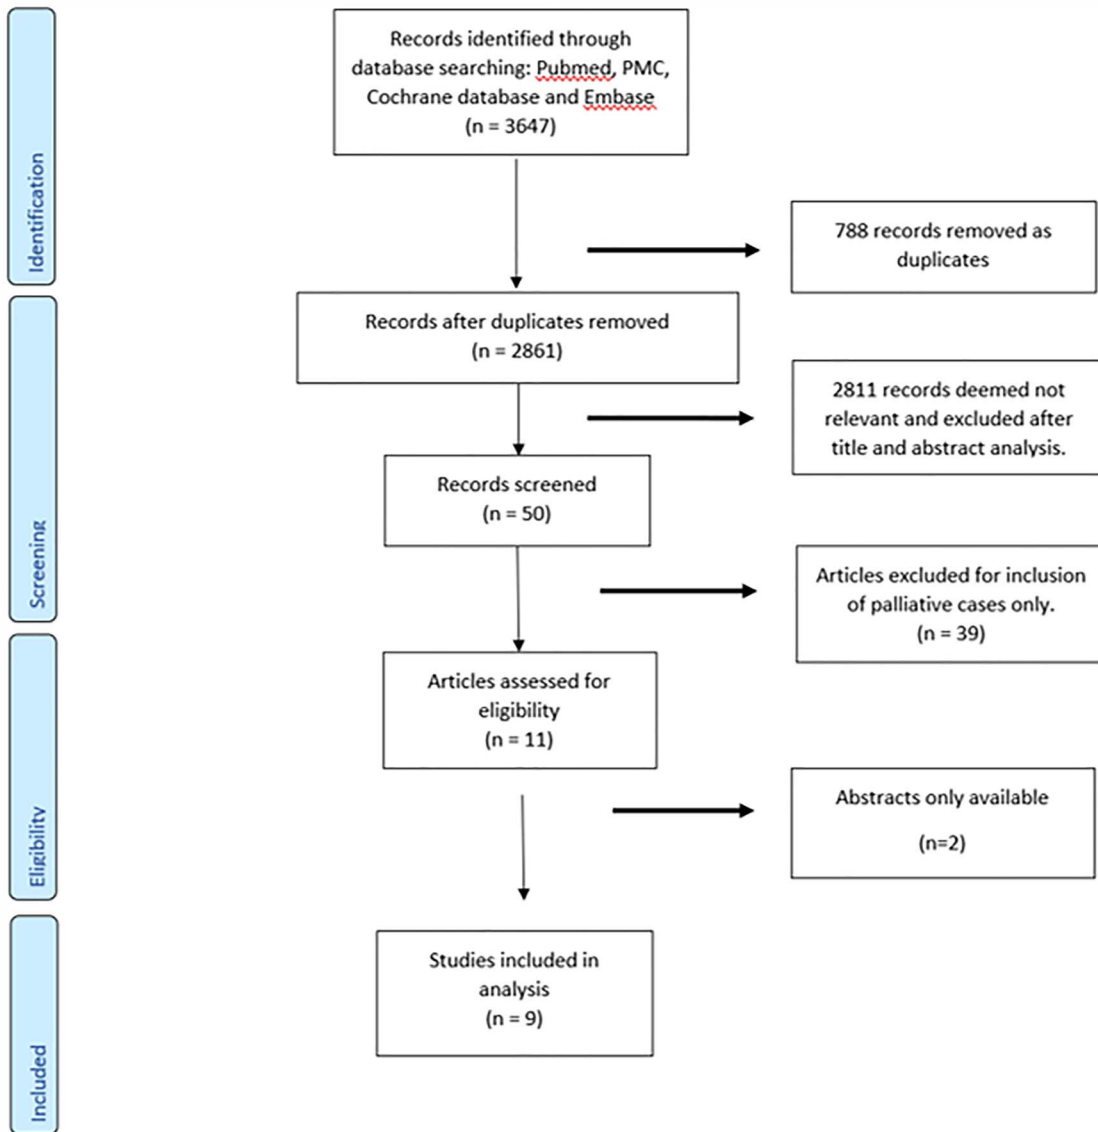

Fig. 1 Inclusion of studies and workflow.

The remaining 9 studies contained sufficient detail to merit inclusion in the extractable and analyzable dataset. The search strategy and outcomes are summarized in Figure 1.

### Study characteristics

The dataset consisted of 9 original articles and yielded a total of 465 patients with study groups ranging from 11 to 169 patients.<sup>14–22</sup> Four studies originated from the USA, three were from Europe and the remaining two studies were conducted in Asia. The main characteristics of eligible studies are characterized in Table 2. Four studies were conducted prospectively and all studies included patients undergoing esophageal stenting prior to or during neoadjuvant therapy before a planned curative resection. Three studies included data on a comparative control group whereby data on patients undergoing a gastrostomy feeding tube<sup>16</sup> and a

cohort with no stent intervention were included for comparison.<sup>15, 20</sup>

### Patient characteristics

The baseline mean age of patients was 62.2 years with an age range of 30–88 years based on data from seven studies.<sup>14, 15, 17, 18, 20–22</sup> Of the 465 patients reviewed in the 9 included studies, 414 were male. Most studies commented on histological subtype with squamous cell carcinomas accounting for 55% of primary malignancies. There was no significant difference in tumor distribution. Tumors were present in the upper, middle and lower esophagus in 15%, 23% and 62%, respectively ( $P = 0.12$ ). Based on the available data of 6 studies, 282 patients had clinical T category of T3 or more.<sup>14–16, 18–20</sup> Esophageal stents were inserted in all patients with a post procedural morbidity rate ranging from 3–55%. Seventy-three patients (21%) required an additional endoscopic

**Table 2** Demographic data of included studies

| Author                               | Year | Country | <i>N</i> | Mean age | Study type    | Sex% males | Sex% female | Stent type                             | Progression to surgery in stented patients % |
|--------------------------------------|------|---------|----------|----------|---------------|------------|-------------|----------------------------------------|----------------------------------------------|
| Langer <i>et al.</i> <sup>22</sup>   | 2010 | Austria | 38       | 66       | Retrospective | 68%        | 32%         | SEPS: 13/38 (34%)<br>SEMS: 25/38 (66%) | 68%                                          |
| Lopes <i>et al.</i> <sup>19</sup>    | 2010 | USA     | 11       | 61       | Prospective   | 91%        | 9%          | FCSEMS                                 | 18%                                          |
| Brown <i>et al.</i> <sup>21</sup>    | 2011 | USA     | 32       | 61       | Prospective   | 81%        | 19%         | SEPS                                   | 63%                                          |
| Pellen <i>et al.</i> <sup>17</sup>   | 2011 | UK      | 16       | 63       | Prospective   | 56%        | 44%         | SEMS                                   | 63%                                          |
| Mariette <i>et al.</i> <sup>15</sup> | 2015 | France  | 38       | 65       | Retrospective | 87%        | 13%         | SEMS                                   | 100%                                         |
| Francis <i>et al.</i> <sup>20</sup>  | 2016 | USA     | 28       | 63       | Retrospective | 95%        | 5%          | SEMS: 17/28 (61%)<br>SEPS: 11/28 (39%) | 29%                                          |
| Min <i>et al.</i> <sup>16</sup>      | 2017 | Korea   | 169      | 65       | Retrospective | 93%        | 7%          | FCSEMS                                 | 5%                                           |
| Smith <i>et al.</i> <sup>18</sup>    | 2017 | USA     | 12       | 59       | Prospective   | 92%        | 8%          | SEMS                                   | 42%                                          |
| Lu <i>et al.</i> <sup>14</sup>       | 2018 | Taiwan  | 46       | 59       | Retrospective | 93%        | 7%          | SEMS                                   | 0%                                           |

*N* = number stented in each study.

FCSEMS, fully covered self-expandable metallic stent; SEMS, self-expandable metallic stent; SEPS, self-expandable plastic stent.

**Table 3** Procedural outcomes and interventions post SEMS insertion

| Author                               | <i>N</i> | Stent morbidity % | % Stent replacement/reintervention |
|--------------------------------------|----------|-------------------|------------------------------------|
| Langer <i>et al.</i> <sup>22</sup>   | 38       | 42%               | 13%                                |
| Lopes <i>et al.</i> <sup>19</sup>    | 11       | 55%               | 9%                                 |
| Brown <i>et al.</i> <sup>21</sup>    | 32       | 41%               | 6%                                 |
| Pellen <i>et al.</i> <sup>17</sup>   | 16       | 25%               | 44%                                |
| Mariette <i>et al.</i> <sup>15</sup> | 38       | 5%                | 21%                                |
| Francis <i>et al.</i> <sup>20</sup>  | 28       | 68%               | 29%                                |
| Min <i>et al.</i> <sup>16</sup>      | 169      | 3%                | 22%                                |
| Smith <i>et al.</i> <sup>18</sup>    | 12       | 42%               | 42%                                |
| Lu <i>et al.</i> <sup>14</sup>       | 46       | –                 | –                                  |

intervention or replacement of a displaced metallic stent (Table 3). Neoadjuvant therapy was explicitly described in 4 studies. In one study, patients received concurrent preoperative chemoradiation therapy combining cisplatin, 5 FU and paclitaxel with radiotherapy dose of 45Gy.<sup>14</sup> In a second study, patients received 5-FU and platinum based chemotherapy with concomitant radiotherapy delivered at 45Gy.<sup>15</sup> A third study administered a combination of cisplatin and paclitaxel or carboplatin and cetuximab with radiotherapy delivered at 50.4Gy.<sup>20</sup> In the last study, patients received preoperative chemotherapy with ECF only.<sup>17</sup>

### Dysphagia/nutrition

Dysphagia was graded using the previously validated Mellow–Pinkas scoring system (Table 4).<sup>23</sup> Six studies reported on patient dysphagia and swallowing status prior to and after esophageal stent insertion.<sup>17–22</sup> Overall, there was a significant improvement in mean dysphagia grades from 2.88 to 0.66 ( $P < 0.01$ ) in the immediate post stent period. Weight and albumin measurements constituted nutritional parameters in 5 studies.<sup>14, 16–18, 22</sup> Albumin levels dropped from a mean value of 3.7 g/dL to 3.5 g/dL post stent insertion but failed to achieve statistical significance ( $P = 0.43$ ). There was a mean weight loss of 4.3 kg post stent

**Table 4** Mellow–Pinkas scoring system for dysphagia

| Grade | Criteria                                   |
|-------|--------------------------------------------|
| 0     | Able to eat normal diet/no dysphagia       |
| 1     | Able to swallow some solid foods           |
| 2     | Able to swallow only semi solid foods      |
| 3     | Able to swallow liquids only               |
| 4     | Unable to swallow anything/total dysphagia |

insertion, however, there was no significant difference on statistical analysis<sup>14, 17, 18, 21</sup> ( $P = 0.64$ ). Pre and post stent BMI was reported in two publications and displayed no significant change in the 54 patients studied ( $-2.25 \text{ kg/m}^2$ ).<sup>17, 21</sup> These results are presented in Table 5.

### Surgery

Of 352 stented patients, 117 were suitable for a potential curative resection. Mariette *et al.* only included patients who underwent potentially curative resection in their study.<sup>15</sup> In the other studies, 79 of 314 patients initially identified as suitable for curative resection progressed to surgery demonstrating an overall potentially curative resection rate of 33% in the stented patient cohort. The most common reason for not proceeding to surgery was disease progression.<sup>17–22</sup> Two studies mention whether SEMS were removed prior to





to surgery. Clearly, these data are heterogeneous and are difficult to draw a definitive conclusion from.

Ideally patients would be comprehensively restaged following neoadjuvant treatment. This is limited by the placement of metal stents which will interfere with computerized tomography, making locoregional assessment difficult. This is further limited by the fact that CT and PET-CT in fact have poor sensitivity and specificity for restaging esophageal cancers, even without the presence of a stent.<sup>31</sup>

Overall, this review has suggested a high rate of margin positivity when stents are used, up to 29.8% for R1 and R2 resections.<sup>32</sup> This is a predictor of poor long-term survival.<sup>32</sup> In their propensity-score matched analysis, Mariette *et al.*<sup>15</sup> only included patients who underwent an operation with curative intent of their esophageal malignancy. They directly compared a cohort with SEMs to those who had a percutaneous tube feeding placed preoperatively. Concerningly, patients who had a stent inserted during neoadjuvant therapy fared significantly worse in terms of R0 resection rates, overall survival and 3-year locoregional disease recurrence.<sup>15</sup> Whether the use of stents leads to fewer patients progressing to surgery and impaired oncologic outcomes needs further definitive evaluation.

Data on the impact of esophageal stent insertion on patient survival are limited. Few papers explicitly examine the issue of long-term survival, with only four papers providing adequate data on long-term outcomes.<sup>14–16, 20</sup> Again, it is difficult to distinguish whether this is simply a reflection of these patients having more advanced disease or whether stenting plays a significant role.

There is considerable heterogeneity in reporting of outcomes relating to stents and many studies combine results for SEMs and SEPS.<sup>14, 20–22</sup> There is a correlation between SEMs usage and the development of serious complications during neoadjuvant radiation therapy.<sup>24, 32</sup> One potential solution may be the use of biodegradable stents. Unfortunately, data regarding the role of biodegradable stents to relieve dysphagia as a bridge to surgery are limited to small case series.<sup>33, 34</sup> In other malignancies, such as colorectal cancer, the utility of pre-operative stenting remains a source of debate. The European Society of Gastrointestinal Endoscopy recommends that stents should not be placed routinely as a bridge to surgery for left sided colorectal cancers due to concerns over oncological safety, although in highly selected cases they may be of benefit.<sup>9, 35</sup> There is no consensus on whether stents should be removed preoperatively. The authors feel that if technically feasible, stents should be removed preoperatively to facilitate surgery; however, in cases where there is tumor overgrowth or significant inflammatory reaction, this may not be possible.

Although extrapolating from small volume publications is not ideal, the consensus from all articles

included in this review is that stents during neoadjuvant therapy are associated with worse outcomes in esophageal cancer patients. The results demonstrate that metallic and plastic stenting offers no obvious nutritional or oncological benefit in malignant dysphagia when used as a bridge to surgery and may negatively impact progression to resection with curative intent. A recent population-based study from Scandinavia showed a trend toward increased mortality postoperatively with pre-operative stent placement. Although they did not give data on oncological safety, this raises further safety concerns.<sup>11</sup>

Our study is limited by the quality of the studies available for inclusion, heterogeneity of reported results and the lack of sufficient comparative analyses with control groups. No quality of life measurements were available to interpret, despite four of the selected studies being prospective. No randomized studies on stenting during neoadjuvant therapy as a bridge to potentially curative resection exist and a void in the literature is apparent. The evidence base for the utility of SEMs and SEPS during chemoradiation is poor at present with most guidelines reliant on the clinical acumen of specialist centers, small volume case series or reviews combining the effects of metallic, biodegradable and various polyflex prostheses.

## CONCLUSION

This systematic review has shown that although esophageal stents are associated with improvements in dysphagia during neoadjuvant therapy, they do not improve nutritional markers in the preoperative setting and may be associated with poorer long-term oncological outcomes. Stents should not be routinely used in patients who are being considered for resection with curative intent for esophageal malignancies. Instead nutritional needs can be met using total parenteral nutrition, naso-enteral feeding or percutaneous enteral feeding. Although these have no effect on dysphagia, they may be more likely to meet the nutritional requirements of patients without the possibility of compromising oncological outcomes.<sup>6, 36</sup> Direct comparison of these strategies would be beneficial in a well-designed randomized controlled trial.

## CONFLICT OF INTEREST

The authors declare that they have no conflict of interest.

## References

- Shapiro J, van Lanschot JJB, Hulshof M, van Hagen P, van Berge Henegouwen MI, Wijnhoven BPL *et al.* Neoadjuvant chemoradiotherapy plus surgery versus surgery alone for oesophageal or junctional cancer (CROSS): long-term results

- of a randomised controlled trial. *Lancet Oncol* 2015; 16(9): 1090–8.
- 2 Mariette C, De Botton M-L, Piessen G. Surgery in esophageal and gastric cancer patients: What is the role for nutrition support in your daily practice? *Ann Surg Oncol* 2012; 19(7): 2128–34.
  - 3 Riccardi D, Allen K. Nutritional Management of Patients with Esophageal and Esophagogastric Junction Cancer: several strategies can be incorporated to preserve or restore nutritional status of malnourished patients during management of esophageal cancer. *Cancer Control* 1999; 6(1): 64–72.
  - 4 Santarpia L, Contaldo F, Pasanisi F. Nutritional screening and early treatment of malnutrition in cancer patients. *J Cachexia Sarcopenia Muscle* 2011; 2(1): 27–35.
  - 5 Tan BHL, Brammer K, Randhawa N, Welch NT, Parsons SL, James EJ *et al*. Sarcopenia is associated with toxicity in patients undergoing neo-adjuvant chemotherapy for oesophago-gastric cancer. *Eur J Surg Oncol (EJSO)* 2015; 41(3): 333–8.
  - 6 Jenkins TK, Lopez AN, Sarosi GA, Ben-David K, Thomas RM. Preoperative enteral access is not necessary prior to multimodality treatment of esophageal cancer. *Surgery* 2018; 163(4): 770–6.
  - 7 Xu YJ, Cheng JC, Lee JM, Huang PM, Huang GH, Chen CC. A walk-and-eat intervention improves outcomes for patients with Esophageal Cancer undergoing Neoadjuvant Chemoradiotherapy. *Oncologist* 2015; 20(10): 1216–22.
  - 8 Evans JA, Early DS, Chandraskhara V, Chathadi KV, Fanelli RD, Fisher DA *et al*. The role of endoscopy in the assessment and treatment of esophageal cancer. *Gastrointest Endosc* 2013; 77(3): 328–34.
  - 9 Spaander MC, Baron TH, Siersema PD, Fuccio L, Schumacher B, Escorsell À *et al*. Esophageal stenting for benign and malignant disease: European Society of Gastrointestinal Endoscopy (ESGE) clinical guideline. *Endoscopy* 2016; 48(10): 939–48.
  - 10 Nagaraja V, Cox MR, Eslick GD. Safety and efficacy of esophageal stents preceding or during neoadjuvant chemotherapy for esophageal cancer: A systematic review and meta-analysis. *J Gastrointestinal Oncol* 2014; 5(2): 119–26.
  - 11 Helminen O, Kauppila JH, Kyto V, Gunn J, Lagergren J, Sihvo E. Preoperative esophageal stenting and short-term outcomes of surgery for esophageal cancer in a population-based study from Finland and Sweden. *Dis Esophagus* 2019.
  - 12 Moher D, Liberati A, Tetzlaff J, Altman DG, Group P. Preferred reporting items for systematic reviews and meta-analyses: the PRISMA statement. *PLoS Med* 2009; 6(7): e1000097.
  - 13 Slim K, Nini E, Forestier D, Kwiatkowski F, Panis Y, Chipponi J. Methodological index for non-randomized studies (MINORS): development and validation of a new instrument. *ANZ J Surg* 2003; 73(9): 712–6.
  - 14 Lu YF, Chung CS, Liu CY, Shueng PW, Wu LJ, Hsu CX *et al*. Esophageal metal stents with concurrent chemoradiation therapy for locally advanced Esophageal Cancer: Safe or not? *Oncologist* 2018; 23(12): 1426–35.
  - 15 Mariette C, Gronnier C, Duhamel A, Mabrut J-Y, Bail J-P, Carrere N *et al*. Self-expanding covered metallic stent as a bridge to surgery in esophageal cancer: impact on oncologic outcomes. *J Am Coll Surg* 2015; 220(3): 287–96.
  - 16 Min YW, Jang EY, Jung JH, Lee H, Min BH, Lee JH *et al*. Comparison between gastrostomy feeding and self-expandable metal stent insertion for patients with esophageal cancer and dysphagia. *PLoS One* 2017; 12(6): e0179522.
  - 17 Pellen MG, Sabri S, Razack A, Gilani SQ, Jain PK. Safety and efficacy of self-expanding removable metal esophageal stents during neoadjuvant chemotherapy for resectable esophageal cancer. *Dis Esophagus* 2012; 25(1): 48–53.
  - 18 Smith ZL, Gonzaga JE, Haasler GB, Gore EM, Dua KS. Self-expanding metal stents improve swallowing and maintain nutrition during Neoadjuvant therapy for Esophageal Cancer. *Dig Dis Sci* 2017; 62(6): 1647–56.
  - 19 Lopes TL, Eloubeidi MA. A pilot study of fully covered self-expandable metal stents prior to neoadjuvant therapy for locally advanced esophageal cancer. *Dis Esophagus* 2010; 23(4): 309–15.
  - 20 Francis SR, Orton A, Thorpe C, Stoddard G, Lloyd S, Anker CJ. Toxicity and outcomes in patients with and without Esophageal stents in locally advanced Esophageal Cancer. *Int J Radiat Oncol \*Biol\*Phys* 2017; 99(4): 884–94.
  - 21 Brown RE, Abbas AE, Ellis S, Williams S, Scoggins CR, McMasters KM *et al*. A prospective phase II evaluation of Esophageal stenting for neoadjuvant therapy for esophageal cancer: optimal performance and surgical safety. *J Am Coll Surg* 2011; 212(4): 582–8.
  - 22 Langer FB, Schoppmann SF, Prager G, Tomaselli F, Pluschnig U, Hejna M *et al*. Temporary placement of self-expanding oesophageal stents as bridging for neo-adjuvant therapy. *Ann Surg Oncol* 2010; 17(2): 470–5.
  - 23 Knyrim K, Wagner H-J, Bethge N, Keymling M, Vakil N. A controlled trial of an Expansile metal stent for palliation of Esophageal obstruction due to inoperable Cancer. *N Engl J Med* 1993; 329(18): 1302–7.
  - 24 Jones CM, Griffiths EA. Should oesophageal stents be used before neo-adjuvant therapy to treat dysphagia in patients awaiting oesophagectomy? Best evidence topic (BET). *Int J Surg (London, England)* 2014; 12(11): 1172–80.
  - 25 Sunde B, Johnsen G, Jacobsen AB, Glenjen NI, Friesland S, Lindblad M *et al*. Effects of neoadjuvant chemoradiotherapy vs chemotherapy alone on the relief of dysphagia in esophageal cancer patients: secondary endpoint analysis in a randomized trial. *Dis Esophagus* 2019; 32(2): doi: 10.1093/dote/doy069.
  - 26 Park JH, Kim TH, Cho YC, Bakheet N, Lee SO, Kim SH *et al*. Balloon-Expandable Biodegradable Stents Versus Self-Expandable Metallic Stents: A Comparison Study of Stent-Induced Tissue Hyperplasia in the Rat Urethra. *Cardiovasc Intervent Radiol* 2019; 13: 1–9.
  - 27 Vendrely V, Launay V, Najah H, Smith D, Collet D, Gronnier C. Prognostic factors in esophageal cancer treated with curative intent. *Dig Liver Dis* 2018; 50(10): 991–6.
  - 28 Rahouma M, Harrison S, Kamel M, Nasar A, Lee B, Port J *et al*. Consequences of refusing surgery for esophageal cancer: a National Cancer Database Analysis. *Ann Thorac Surg* 2018; 106(5): 1476–83.
  - 29 Saddoughi SA, Reinersman JM, Zhukov YO, Taswell J, Mara K, Harmsen SW *et al*. Survival after surgical resection of stage IV esophageal cancer. *Ann Thorac Surg* 2017; 103(1): 261–6.
  - 30 de Castro Junior G, Segalla JG, de Azevedo SJ, Andrade CJ, Grabarz D, de Aratijo Lima França B *et al*. a randomised phase II study of chemoradiotherapy with or without nimotuzumab in locally advanced oesophageal cancer: NICE trial. *Eur J Cancer* 2018; 88: 21–30.
  - 31 de Gouw D, Klarenbeek BR, Driessen M, Bouwense S A W, van Workum F, Futterer JJ *et al*. Detecting pathological complete response in esophageal cancer after neoadjuvant therapy based on imaging techniques: a diagnostic systematic review and meta-analysis. *J Thorac Oncol* 2019; 14(7): 1156–71.
  - 32 Dai Y, Li C, Xie Y, Liu X, Zhang J, Zhou J *et al*. Interventions for dysphagia in oesophageal cancer. *Cochrane Database Syst Rev* 2014(10).
  - 33 Krokidis M, Burke C, Spiliopoulos S, Gkoutzios P, Hynes O, Ahmed I *et al*. The use of biodegradable stents in malignant oesophageal strictures for the treatment of dysphagia before neoadjuvant treatment or radical radiotherapy: a feasibility study. *Cardiovasc Intervent Radiol* 2013; 36(4): 1047–54.
  - 34 Griffiths EA, Gregory CJ, Pursnani KG, Ward JB, Stockwell RC. The use of biodegradable (SX-ELLA) oesophageal stents to treat dysphagia due to benign and malignant oesophageal disease. *Surg Endosc* 2012; 26(8): 2367–75.
  - 35 Donlon NE, Kelly ME, Narouz F, McCormick PH, Larkin JO, Mehigan BJ. Colonic stenting as a bridge to surgery in malignant large bowel obstruction: oncological outcomes. *Int J Colorectal Dis* 2019; 34(4): 613–9.
  - 36 Chen MJ, Wu IC, Chen YJ, Wang TE, Chang YF, Yang CL *et al*. Nutrition therapy in esophageal cancer-consensus statement of the Gastroenterological Society of Taiwan. *Dis Esophagus* 2018; 31(8). doi: 10.1093/dote/doy016.
